# Supplementary material for: The association between serum CD4 T lymphocyte counts and surgical outcomes in HIV/AIDS patients in Guangxi, China: a retrospective cohort study
Source: PeerJ. 2021 Sep 20;9:e12023. doi: 10.7717/peerj.12023 (PMC8459729; doi:10.7717/peerj.12023)
Supplement: Supplemental Information 1 [file peerj-09-12023-s001.xlsx]

## Sheet: Raw_Data
Raw Data with *Codebook
Preoperative demographics												Preoperative baseline						Surgical characteristics and postoperative outcomes (Clean incision is represented by "Ⅰ", possible contaminated incision "Ⅱ", contaminated incision "Ⅲ")
Number	Age (years)	Age Group	Time of Enrollment of Study Subjects	Gender	Ethnicity	Occupation	Educational Background	Route of HIV Infection	complication	Weight (kg)	Height(cm)	BMI	BMI Category	Duration of Initial ART	Duration of HAART Treatment	RBC（×1012/L）	Hb（g/L）	Albumin (g/L)	CD4 Count（cells/μl）	CD4/CD8	Surgery Grading	Surgery Type	Surgery ICD-10 Codes	Surgery Codes	Type of Admission (1 for Emergency, 0 for Elective)	Classification of Incision		Minimally Invasive Surgery	Wound Healing (A for Good; B for Poor; C for Infected)	Wound Healing Category	Postoperative Complication Codes
1	34	0	2017-09-06	0	2	1	5	0	0	42	168	14.881	1		1	2.72	88	38.8	393	0.29	Ⅳ	1	M87.800x051	81.5100	0	Ⅰ	0	1	A	0
2	36	0	2017-05-18	1	2	1	5	0	0	41	148	18.718	2	2007-05-16	1	3.92	118	47	1698	0.36	Ⅱ	1	M25.805	80.8301	0	Ⅰ	0	0	A	0
3	68	1	2017-03-10	0	2	1	6	0	0	48	168	17.0068	1	2013-04-19	1	4.4	115	44.3	278	0.34	Ⅲ	1	S92.000	79.3700x013	1	Ⅰ	0	1	A	0
4	61	1	2019-05-05	0	1	1	6	0	0	50	162	19.052	2		1	3.24	76	26.5	31	0.35	Ⅱ	1	R02.x00	77.2900x003	0	Ⅰ	0	1	A	0	K92.210
5	59	0	2018-03-23	1	2	1	5	0	0	44	158	17.6254	1	2018-03-06	1	3.77	106	40.4	222	0.31	Ⅳ	1	M87.800x051	81.5200	0	Ⅰ	0	1	A	0
6	39	0	2017-12-22	1	1	3	5	0	0	48	160	18.75	2	2008-08-05	1	2.12	83	30.9	433	0.98	Ⅲ	1	R02.x00	77.3907	0	Ⅲ	1	1	B	1
7	56	0	2017-08-08	0	2	1	5	0	1	70	168	24.8016	3	2016-06-27	1	3.06	123	41.8	179	0.22	Ⅳ	1	M87.800x051	81.5200	0	Ⅰ	0	1	A	0	T81.406
8	36	0	2017-09-20	0	2	1	5	0	0	60	174	19.8177	2	2015-06-06	1	2.47	99	38.5	87	0.53	Ⅲ	1	S72.000	79.3500x018	1	Ⅰ	0	1	A	0
9	75	1	2017-01-11	0	2	3	5	0	0	56	170	19.3772	2	2016-08-16	1	4.45	101	31.2	343	0.4	Ⅳ	1	S72.000	81.5200	0	Ⅰ	0	1	A	0	J98.414
10	37	0	2017-01-03	0	2	1	5	0	1	65	167	23.3067	2	2010-03-26	1	3.52	138	48.9	541	0.52	Ⅲ	1	S42.000	79.3904	1	Ⅰ	0	1	A	0
11	75	1	2015-04-10	0	1	3	5	0	1	55	152	23.8054	2	2010-03-23	1	3.86	127	40.2	762	0.63	Ⅲ	1	S82.000	78.5600	1	Ⅰ	0	1	A	0
12	30	0	2015-07-08	1	1	1	6	0	1	43	156	17.6693	1	2012-03-06	1	3.43	128	45	728	0.76	Ⅱ	1	Z47.000x002	78.6701	0	Ⅰ	0	1	A	0
13	42	0	2015-05-11	0	1	2	5	0	1	60	175	19.5918	2	2007-08-29	1	3.52	125	47.3	235	0.56	Ⅲ	1	M86.913	41.3800x001	0	Ⅲ	1	1	B	1
14	51	0	2017-04-10	0	2	1	6	0	1	66	168	23.3844	2	2010-11-22	1	3.07	120	41.5	235	0.32	Ⅳ	1	M87.800x051	81.5100	0	Ⅰ	0	1	A	0
15	33	0	2017-02-05	1	1	2	5	0	1	44	160	17.1875	1	2013-07-25	1	3.43	95	40.1	154	0.57	Ⅲ	1	S72.000	79.3501	1	Ⅰ	0	1	A	0
16	59	0	2018-08-16	0	2	1	6	0	0	60	162	22.8624	2	2015-06-16	1	4.17	128	39.2	385	0.25	Ⅲ	1	S42.000	79.3904	1	Ⅰ	0	1	A	0	T81.406
17	46	0	2016-10-01	0	3	1	6	0	0	52	160	20.3125	2	2016-08-18	1	3.6	104	40.5	148	0.31	Ⅳ	1	A18.007+M49.0*	81.0500x006	0	Ⅲ	1	1	A	0	J98.414
18	51	0	2018-08-20	0	1	1	6	0	0	43	165	15.7943	1	2011-09-30	1	2.78	96	72.6	319	0.85	Ⅳ	1	A18.007+M49.0*	81.0500x006	0	Ⅲ	1	1	A	0	J98.414
19	47	0	2019-03-06	1	1	1	5	0	1	45	157	18.2563	1	2007-10-19	1	3.06	128	42.7	231	0.62	Ⅰ	1	L90.900x014	86.3x16	0	Ⅰ	0	1	A	0
20	45	0	2017-09-16	0	2	1	6	0	0	57	170	19.7232	2	2017-03-27	1	4.57	89	32	443	0.54	Ⅳ	1	M87.800x051	81.5200	0	Ⅰ	0	1	A	0
21	53	0	2019-06-06	0	1	1	5	1	0	61	161	23.533	2	2013-01-08	1	2.96	125	41.5	201	0.35	Ⅰ	1	M89.900x072	77.6903	0	Ⅰ	0	1	A	0
22	38	0	2015-06-08	0	1	1	6	0	0	72	165	26.4463	3	2012-12-12	1	2.5	83.2	36.1	331	0.38	Ⅲ	1	S72.101	79.3500x016	1	Ⅰ	0	1	A	0	I50.000
23	52	0	2018-03-02	0	2	1	5	0	1	50	157	20.2848	2	2012-11-28	1	3.57	113	37.2	369	0.81	Ⅳ	1	A18.007+M49.0*	81.0800x016	0	Ⅲ	1	1	A	0
24	54	0	2018-04-04	0	1	1	6	0	1	69	170	23.8754	2	2012-06-29	1	3	104	35.8	164	0.54	Ⅰ	2	M89.900x072	86.3x03	0	Ⅲ	1	1	A	0
25	33	0	2015-01-29	0	1	2	1	0	0	61	162	23.2434	2		1	2.9	109.6	43	117	0.24	Ⅳ	1	A18.007+M49.0*	81.0502	0	Ⅲ	1	1	A	0	T81.406
26	34	0	2019-02-14	1	1	2	5	0	1	50	156	20.5457	2	2010-04-02	1	3.69	123	29.9	356	0.37	Ⅳ	1	M87.800x051	81.5200	0	Ⅰ	0	1	A	0
27	35	0	2019-03-13	0	1	1	5	0	1	67	178	21.1463	2	2015-09-07	1	3.53	133	41.4	514	0.45	Ⅳ	1	M87.800x051	81.5200	0	Ⅰ	0	1	A	0	T81.406
28	49	0	2017-12-08	1	1	1	5	0	0	53	159	20.9644	2	2017-01-11	1	3.83	115	34.2	244	0.32	Ⅳ	1	M87.800x051	81.5200	0	Ⅰ	0	1	A	0	T81.406
29	38	0	2016-10-11	1	1	1	6	0	1	38	155	15.8169	1	2012-11-22	1	2.52	50	32.2	160	0.44	Ⅱ	2	A18.207	40.1103	0	Ⅲ	1	1	A	0
30	33	0	2016-08-17	0	2	1	5	0	1	61	171	20.8611	2	2008-12-19	1	2.5	110	36.6	409	0.68	Ⅲ	1	S42.000	79.3904	1	Ⅰ	0	1	A	0
31	64	1	2018-09-10	0	2	1	6	0	0	56	175	18.2857	1		1	3.8	109	31.9	930	0.05	Ⅰ	2	A18.205	40.2900x021	0	Ⅲ	1	1	A	0
32	46	0	2018-08-28	0	2	1	5	1	1	48	165	17.6309	1	2018-10-08	1	4.1	125	41.7	28	0.8	Ⅲ	1	S42.301	79.3101	1	Ⅰ	0	1	A	0
33	65	1	2018-04-09	1	2	1	6	0	1	55	162	20.9572	2	2017-07-31	1	2.4	73	34	382	0.69	Ⅳ	1	M87.800x051	81.5200	0	Ⅰ	0	1	A	0
34	34	0	2016-03-07	0	2	1	6	0	1	52	162	19.8141	2	2010-01-04	1	3.01	124	43.4	383	0.47	Ⅰ	1	Z47.000x002	78.6201	0	Ⅰ	0	1	A	0	T81.406
35	47	0	2019-01-25	0	2	1	6	0	0	44	155	18.3143	1	2016-01-25	1	4.38	85	29.9	128	0.24	Ⅰ	1	A18.034+M01.1*	80.8601	0	Ⅲ	1	1	B	1
36	75	1	2017-11-20	0	2	1	5	0	1	59	160	23.0469	2	2018-01-10	1	3.3	100	38.5	298	0.31	Ⅲ	1	S82.202	79.3601	1	Ⅰ	0	1	A	0	T81.406
37	67	1	2015-09-13	1	2	1	6	0	1	51	152	22.0741	2	2014-05-21	1	4.07	129	47.8	577	0.82	Ⅰ	2	T23.300x003	86.6905	0	Ⅰ	0	1	C	1
38	36	0	2016-04-05	0	1	1	6	0	1	58	164	21.5645	2	2015-06-30	1	4.53	114	42.2	130	0.12	Ⅰ	2	M79.906	86.2201	0	Ⅲ	1	1	A	0
39	35	0	2016-03-25	0	1	1	5	1	1	55	162	20.9572	2	2016-06-12	0	3.75	114	39.8	53	0.2	Ⅲ	1	S72.000	79.3501	1	Ⅰ	0	1	A	0	T81.406
40	30	0	2015-04-04	0	2	1	6	0	1	53	169	18.5568	2	2011-11-07	0	3.59	125	44.7	203	0.66	Ⅲ	1	S82.201	79.3601	1	Ⅰ	0	1	A	0
41	40	0	2019-03-01	0	1	1	5	0	1	62	173	20.7157	2	2006-06-08	0	4.26	141	25.2	713	0.38	Ⅲ	1	S42.000	79.3900x051	1	Ⅰ	0	1	A	0
42	45	0	2017-12-03	0	2	1	5	0	1	66	170	22.8374	2	2014-02-17	1	3.87	137	36.2	121	0.6	Ⅱ	1	M89.900x072	77.6903	0	Ⅲ	1	1	A	0
43	56	0	2017-06-22	0	1	3	3	0	1	53	173	17.7086	1	2005-10-01	0	4.16	134	35.2	2631	0.32	Ⅲ	1	S82.000	79.3900x001	1	Ⅰ	0	1	A	0
44	56	0	2018-11-05	0	1	2	5	0	1	46	164	17.1029	1	2013-12-07	0	2.09	80	36.6	231	0.5	Ⅲ	1	S82.202	79.3601	1	Ⅰ	0	1	A	0
45	53	0	2016-11-26	1	1	1	6	0	1	51.5	155	21.436	2	2017-01-16	1	4.41	101	35.8	220	0.35	Ⅲ	1	S72.101	79.3500x017	1	Ⅰ	0	1	A	0
46	64	1	2016-05-16	0	1	1	6	0	1	58	165	21.3039	2	2012-12-25	1	3.7	151	44.7	156	0.32	Ⅰ	1	M51.204	81.0800x016	1	Ⅰ	0	1	A	0	T81.406
47	45	0	2018-08-10	0	1	1	5	0	1	60	170	20.7612	2	2011-03-29	1	4.21	136	43.2	222	0.51	Ⅲ	1	S43.100	79.8903	1	Ⅰ	0	1	A	0	J98.414
48	59	0	2018-06-13	0	1	1	6	0	0	55	155	22.8928	2	2018-07-25	0	3.36	107	37	57	0.29	Ⅱ	1	S82.300x011	79.3600x017	1	Ⅰ	0	1	A	0
49	43	0	2019-01-24	0	1	4	6	0	1	60	170	20.7612	2	2017-08-15	0	3.26	110	38.2	120	0.23	Ⅳ	1	M87.800x051	81.5200	0	Ⅰ	0	1	A	0	T81.406
50	51	0	2016-03-26	0	1	2	6	0	1	45	166	16.3304	1	2013-11-26	0	2.98	122	31.7	753	0.45	Ⅱ	1	L08.900x022	84.3x00	0	Ⅰ	0	1	A	0
51	43	0	2019-02-01	0	1	2	4	1	0	60	170	20.7612	2	2017-08-30	1	3.11	108	37.8	204	0.48	Ⅳ	1	M87.800x051	81.5100	0	Ⅰ	0	1	A	0
52	57	0	2019-02-21	0	2	4	4	0	1	55	170	19.0311	2	2013-03-26	1	4.3	130	40.1	299	0.5	Ⅳ	1	M87.800x051	81.5100	0	Ⅰ	0	1	A	0
53	42	0	2018-05-15	0	1	2	4	0	0	55	170	19.0311	2	2010-08-19	1	3.76	138	45.3	316	0.31	Ⅲ	1	S82.201	79.3601	1	Ⅰ	0	1	A	0	T81.406
54	54	0	2018-03-15	1	1	2	4	0	1	42	150	18.6667	2	2013-10-11	1	2.12	85	39.7	289	0.47	Ⅳ	1	M87.800x051	81.5100	0	Ⅰ	0	1	A	0
55	56	0	2017-05-16	0	1	4	6	0	1	67	163	25.2174	3	2010-12-15	1	3.47	141	50.4	253	0.54	Ⅱ	2	D36.705	83.3200x001	0	Ⅰ	0	1	A	0	T81.406
56	49	0	2018-10-14	0	1	3	4	0	1	50	162	19.052	2	2014-07-08	1	4.3	144.8	43	685	0.87	Ⅲ	1	S42.000	79.3900x051	1	Ⅰ	0	1	A	0
57	39	0	2015-07-28	0	1	4	4	0	0	50	168	17.7154	1	2014-12-19	1	2.1	83	31.5	643	0.95	Ⅱ	2	M89.900x072	86.0400x011	1	Ⅲ	1	1	A	0	T81.406
58	32	0	2019-04-11	1	1	2	4	0	1	45	160	17.5781	1	2015-05-21	1	3.52	120	36.6	172	0.86	Ⅳ	1	M87.800x051	81.5100	0	Ⅰ	0	1	A	0
59	47	0	2016-07-07	0	1	2	6	0	1	62	167	22.231	2	2013-06-14	1	4.93	126	44.9	271	0.48	Ⅱ	1	S42.000	79.3900x051	1	Ⅰ	0	1	A	0
60	61	1	2017-09-25	0	1	2	6	0	1	52	158	20.83	2	2013-06-28	1	2.8	117	42.3	444	0.64	Ⅱ	2	L08.804	83.3200x001	1	Ⅲ	1	1	A	0
61	47	0	2019-03-26	1	1	4	4	0	1	45	152	19.4771	2	2012-02-10	1	2.82	123	40.5	595	0.56	Ⅳ	1	M51.204	81.0800x016	1	Ⅰ	0	1	A	0	T81.406
62	36	0	2019-03-13	1	1	2	4	0	0	65	164	24.1672	3	2013-04-28	1	3.61	138	43	302	0.24	Ⅳ	1	M87.800x051	81.5100	0	Ⅰ	0	1	A	0	T81.406
63	37	0	2016-09-26	0	1	4	4	0	1	50	170	17.301	1	2016-11-24	1	4.78	134	41.9	343	0.53	Ⅱ	1	M89.900x072	77.6903	1	Ⅲ	1	1	A	0
64	45	0	2019-03-26	0	1	2	4	0	1	51	163	19.1953	2	2011-06-07	1	3.63	135	38.6	363	0.63	Ⅳ	1	M87.800x051	81.5100	0	Ⅰ	0	1	A	0
65	35	0	2019-03-26	0	2	2	4	0	1	48	160	18.75	2	2018-08-09	1	3.27	72	39.3	203	0.52	Ⅳ	1	M87.800x051	81.5100	0	Ⅰ	0	1	A	0
66	40	0	2016-07-13	0	1	9	2	0	1	79	172	26.7036	3	2010-11-30	1	3.26	104	37.4	511	0.79	Ⅲ	1	S72.900	79.3501	1	Ⅰ	0	1	A	0
67	66	1	2017-09-10	0	1	2	4	0	1	45	155	18.7305	2	2017-10-16	1	4.4	128	39.2	223	0.52	Ⅳ	1	M51.202	81.0800x016	0	Ⅰ	0	1	A	0
68	64	1	2016-12-19	0	1	1	6	0	1	60	165	22.0386	2	2011-11-17	1	3.92	87	33.4	305	0.49	Ⅲ	1	S82.202	79.3601	1	Ⅰ	0	1	A	0
69	60	0	2017-07-26	0	1	1	6	0	1	65	170	22.4913	2	2009-09-01	1	2.95	118	43.1	693	0.56	Ⅰ	1	M89.900x072	77.2900x005	0	Ⅰ	0	1	C	1
70	50	0	2018-10-16	1	2	1	5	0	1	52	150	23.1111	2	2018-11-16	1	4.65	135	36.8	348	0.63	Ⅲ	1	Z47.000x002	78.6501	1	Ⅰ	0	1	A	0	T81.406
71	40	0	2018-10-04	0	1	5	3	1	1	73	168	25.8645	3	2014-06-26	1	2.83	119	42.9	936	0.89	Ⅲ	1	S42.000	79.3904	1	Ⅰ	0	1	A	0
72	53	0	2018-09-18	1	1	1	6	0	1	49	156	20.1348	2	2019-04-30	1	4.19	123	38	381	0.43	Ⅲ	1	S82.600	79.3603	1	Ⅰ	0	1	A	0
73	32	0	2016-07-03	1	1	1	4	0	0	40	152	17.313	1	2010-08-10	1	3.03	96	38.8	245	0.9	Ⅲ	1	A18.034+M01.1*	80.8601	0	Ⅲ	1	1	A	0
74	44	0	2017-03-29	0	1	1	6	0	1	70	170	24.2215	3		0	4.57	136	42	359	0.77	Ⅲ	1	S92.000	79.3700x013	1	Ⅰ	0	1	A	0	T81.406
75	44	0	2017-05-08	0	1	1	5	0	1	52	160	20.3125	2	2012-03-27	1	3.21	127	36.5	222	0.35	Ⅱ	1	M66.204	82.4501	1	Ⅰ	0	1	A	0
76	30	0	2017-04-18	0	2	1	4	0	0	60	167	21.5139	2		1	3.6	110	30.5	117	0.11	Ⅲ	1	S72.900	79.3501	1	Ⅰ	0	1	A	0
77	64	1	2016-12-28	0	2	1	4	0	0	55	175	17.9592	1	2010-06-10	1	4	84	32.8	358	0.55	Ⅳ	1	A18.007+M49.0*	81.0800x016	0	Ⅲ	1	1	A	0	J98.414
78	40	0	2017-02-12	0	2	1	6	0	1	56	168	19.8413	2	2014-01-03	0	3.68	112	30.06	225	0.39	Ⅱ	1	S90.000	86.0401	1	Ⅲ	1	1	C	1
79	60	0	2018-09-25	0	1	3	2	0	1	50	157	20.2848	2	2018-05-17	0	3.01	89	37	982	0.19	Ⅲ	1	S42.000	79.3900x051	1	Ⅰ	0	1	A	0
80	56	0	2017-07-30	0	2	1	6	0	0	47	158	18.8271	2	2018-08-21	0	4.14	125	44.1	427	0.62	Ⅲ	1	S82.000	81.2200	1	Ⅰ	0	1	A	0
81	65	1	2019-02-15	0	2	1	6	0	1	63	165	23.1405	2		0	4.02	92	30.6	72	0.13	Ⅲ	1	S42.000	79.3904	1	Ⅰ	0	1	A	0
82	64	1	2018-05-23	0	2	2	5	0	0	55	170	19.0311	2	2011-11-19	1	4.1	132	42.7	452	1.16	Ⅱ	4	A16.201	32.2904	0	Ⅲ	1	0	A	0	J94.801
83	38	0	2019-01-03	0	1	1	6	0	1	59	170	20.4152	2	2019-02-02	0	4.42	134	44.2	192	0.69	Ⅲ	3	K20.100	56.2x01	1	Ⅰ	0	1	A	0	R33.x00
84	56	0	2017-12-15	0	1	1	5	0	1	50	160	19.5312	2	2015-07-24	1	3.89	127	42.1	117	0.25	Ⅲ	3	K20.100	56.0x04	1	Ⅱ	1	0	A	0	R31.x00
85	64	1	2018-08-18	0	1	1	5	0	1	51	160	19.9219	2	2018-09-05	1	2.93	106	38.3	297	0.42	Ⅲ	3	K20.100	56.0x04	1	Ⅱ	1	0	A	0	R31.x00
86	31	0	2017-10-13	0	1	1	1	1	0	46	163	17.3134	1	2017-07-18	0	6.07	122	38.7	312	0.21	Ⅲ	2	A18.207	40.5100	0	Ⅲ	1	1	C	1
87	48	0	2017-04-11	0	1	1	5	0	1	68	168	24.093	3	2009-05-26	1	3.76	151	47.5	141	0.3	Ⅱ	2	K35.900	47.0901	1	Ⅲ	1	0	A	0
88	35	0	2017-05-24	0	1	1	5	0	1	49	170	16.955	1	2011-08-22	0	3.91	123	41.1	788	0.78	Ⅱ	2	T18.900	54.9202	1	Ⅰ	0	0	A	0	J98.414
89	31	0	2015-08-07	1	2	1	5	0	0	36.5	160	14.2578	1	2015-07-23	0	3.83	90	23.6	62	0.61	Ⅲ	2	K31.814	44.6901	1	Ⅲ	1	1	B	1	J98.414
90	66	1	2018-06-25	0	2	2	5	0	0	75	170	25.9516	3	2010-04-06	1	2.83	107	42.7	332	1.13	Ⅲ	3	N40.x00	60.2901	0	Ⅱ	1	0	A	0	N39.000
91	54	0	2019-02-27	0	1	1	6	0	1	54	160	21.0938	2		0	5.15	149	43.2	184	0.18	Ⅲ	3	C60.900	64.3x01	0	Ⅱ	1	1	A	0
92	43	0	2018-08-15	1	1	1	5	0	1	75	167	26.8923	3	2016-08-31	1	4.62	122	48.3	1049	0.99	Ⅲ	4	C50.900x011	85.4100x001	0	Ⅰ	0	1	C	1
93	57	0	2015-08-05	1	1	3	4	0	1	40	158	16.0231	1	2019-04-12	1	4.59	135	46.2	332	0.78	Ⅰ	2	C73.x00	06.3100	0	Ⅰ	0	1	A	0
94	53	0	2016-12-29	0	1	1	4	0	1	41	166	14.8788	1	2008-06-25	1	2.85	73	34			Ⅲ	2	K80.501	51.2200	1	Ⅰ	0	1	B	1	K82.300
95	40	0	2019-05-16	0	1	9	4	0	1	55	168	19.487	2	2012-08-01	1	3.32	139	45.1	363	0.59	Ⅱ	2	K61.001	49.0100	1	Ⅲ	1	1	A	0
96	71	1	2017-07-07	0	2	2	5	0	1	62	163	23.3355	2	2016-03-31	1	4.28	144	42.2	447	1.07	Ⅲ	3	K20.000x001	55.1101	1	Ⅰ	0	1	A	0
97	52	0	2017-02-04	1	1	1	5	0	1	67	164	24.9108	3	2007-11-21	1	4.29	132	46.1			Ⅱ	2	E05.900x001	06.3900x013	0	Ⅰ	0	1	A	0
98	39	0	2018-01-24	0	1	1	5	0	1	50	160	19.5312	2	2018-02-08	0	4.58	135	43	350	0.53	Ⅱ	3	K20.100	56.2x01	1	Ⅱ	1	1	A	0	R31.x00
99	47	0	2018-09-14	0	2	1	6	0	1	48	160	18.75	2	2018-10-09	0	4.36	132	33.8	158	0.26	Ⅱ	2	K35.900	47.0901	1	Ⅲ	1	0	A	0	K56.500x003
100	37	0	2018-03-06	0	4	1	4	0	1	62	175	20.2449	2	2016-06-01	1	4.12	147	41.1	179	0.35	Ⅱ	2	R22.005	27.9900x005	0	Ⅱ	1	1	A	0
101	49	0	2018-03-16	0	1	1	5	0	0	60	160	23.4375	2	2008-12-16	1	2.83	119	44.5	758	1.24	Ⅲ	3	K20.100	55.0401	1	Ⅱ	1	0	A	0	R33.x00
102	54	0	2017-04-26	1	2	3	4	0	1	60	165	22.0386	2	2013-06-08	1	3.46	128	39.7	899	1.21	Ⅲ	2	C16.900	43.8901	0	Ⅱ	1	1	A	0	K63.210
103	79	1	2019-02-12	0	1	1	6	0	1	65	158	26.0375	3	2011-01-15	1	4.78	125	37.2	825	1.28	Ⅲ	3	N40.x00	60.2901	0	Ⅱ	1	0	A	0	N39.000
104	55	0	2018-06-08	0	2	1	5	0	1	50.2	165	18.4389	1	2010-01-05	1	4.25	113	43.7	480	0.69	Ⅲ	3	K20.100	57.0x00x013	1	Ⅱ	1	0	A	0	R33.x00
105	73	1	2017-02-13	0	1	1	5	0	1	60	170	20.7612	2	2010-01-05	1	3.3	134	48.9			Ⅱ	2	K40.900x002	53.0501	0	Ⅰ	0	0	A	0
106	66	1	2017-02-09	0	2	1	5	0	1	73	170	25.2595	3	2009-09-28	1	4	140	44.8	267	0.53	Ⅱ	2	K40.900x002	53.0401	0	Ⅰ	0	0	A	0
107	64	1	2019-04-24	0	1	3	4	0	1	66	168	23.3844	2	2006-05-08	1	3.29	140	43	429	0.4	Ⅱ	2	K40.900x002	53.0501	0	Ⅰ	0	0	A	0
108	32	0	2018-04-27	0	1	5	1	0	1	62	160	24.2188	3	2009-12-15	1	3.75	146	45.7	576	0.59	Ⅱ	3	K20.100	56.0x04	1	Ⅱ	1	0	A	0
109	52	0	2018-04-09	0	5	1	5	0	1	69	178	21.7776	2	2016-06-30	1	3.1	114	39.3	138	0.52	Ⅱ	2	K35.900	47.0901	1	Ⅲ	1	0	A	0
110	75	1	2018-01-23	0	1	1	6	0	1	45	155	18.7305	2	2011-11-29	1	3.26	86	30.7	51	0.07	Ⅲ	2	K65.002	54.1900x010	1	Ⅲ	1	1	A	0	R33.x00
111	51	0	2016-12-19	1	2	1	4	0	1	63	162	24.0055	3	2011-03-15	1	3.76	138	44.5	529	0.9	Ⅱ	2	E05.900x001	06.3900x004	0	Ⅰ	0	1	A	0	T81.406
112	66	1	2017-04-13	0	1	1	5	0	1	68	165	24.977	3	2017-05-12	0	4.67	134	40.6	145	0.26	Ⅱ	2	K40.900x002	53.0501	0	Ⅰ	0	0	A	0
113	61	1	2019-01-03	0	1	1	6	0	1	58	165	21.3039	2	2015-02-11	1	4.3	152	41.3	254	0.61	Ⅱ	2	K40.900x002	53.0401	0	Ⅰ	0	0	A	0
114	81	1	2017-05-25	0	1	2	6	0	1	52	170	17.9931	1	2013-06-05	0	3.41	125	42.5	558	0.31	Ⅱ	2	K65.002	54.4x02	1	Ⅲ	1	1	A	0
115	65	1	2017-01-03	1	1	5	4	0	1	50	155	20.8117	2	2012-09-12	1	2.9	69	35.9			Ⅲ	2	C18.900	48.6903	1	Ⅰ	0	1	A	0	K63.212
116	42	0	2018-06-15	1	3	1	6	0	1	55	155	22.8928	2	2017-07-06	1	3.54	113	41.4	115	0.24	Ⅲ	2	R10.000	54.1100	1	Ⅱ	1	1	A	0	R19.001
117	68	1	2017-09-08	0	2	1	6	0	0	65	180	20.0617	2	2017-04-14	1	2.51	97	32.4	85	0.33	Ⅲ	2	K80.501	51.2200	1	Ⅲ	1	1	A	0	K82.300
118	43	0	2017-09-30	1	1	5	1	0	0	50	155	20.8117	2	2008-12-03	1	4.79	151	15.9	725	0.49	Ⅲ	3	N13.504	59.8x03	1	Ⅱ	1	0	A	0	R33.x00
119	38	0	2019-03-25	0	1	1	5	0	1	60	170	20.7612	2	2014-11-07	1	4.29	138	43.3	441	0.7	Ⅲ	3	K20.100	56.0x04	1	Ⅱ	1	0	A	0
120	48	0	2018-07-19	0	1	1	5	0	1	52	162	19.8141	2	2009-09-28	1	5	126	39.6	241	0.58	Ⅱ	2	K40.900x002	53.0501	0	Ⅰ	0	1	C	1	N50.800x023
121	61	1	2017-08-29	0	1	1	6	0	1	49	165	17.9982	1	2017-09-15	0	4.99	138	40.6	121	0.2	Ⅰ	3	A18.118+N51.1*	62.3x03	0	Ⅰ	0	1	C	1
122	58	0	2018-01-02	1	1	1	6	0	1	60	157	24.3418	3	2011-06-15	1	3.75	108	44.6	289	0.48	Ⅱ	2	A18.207	40.1103	0	Ⅲ	1	1	A	0	T81.811
123	46	0	2017-09-07	0	1	1	5	0	1	50	160	19.5312	2	2017-10-20	0	4.28	123	39.2	158	0.34	Ⅱ	3	K20.100	56.2x01	1	Ⅰ	0	0	A	0	R33.x00
124	23	0	2017-12-27	1	3	2	4	0	1	40	155	16.6493	1	2016-12-16	1	2.56	90	30.9	271	0.36	Ⅲ	3	K20.100	56.0x04	1	Ⅱ	1	0	A	0	N39.000
125	76	1	2014-10-01	0	1	1	5	0	0	49	168	17.3611	1	2012-06-09	1	3.1	113.4	39.8	121	0.61	Ⅲ	2	R10.000	54.1100	1	Ⅲ	1	1	A	0
126	38	0	2015-01-07	1	1	1	4	0	1	55	150	24.4444	3	2014-02-25	1	5.49	110	46.1			Ⅱ	2	E05.900x001	06.3900x004	0	Ⅰ	0	1	A	0
127	54	0	2018-03-29	0	1	1	5	0	1	55	155	22.8928	2	2015-08-17	1	2.9	113	46.2	284	0.5	Ⅲ	2	K61.001	49.0100	1	Ⅲ	1	1	C	1	T81.811
128	53	0	2019-02-12	0	1	2	5	1	1	60	170	20.7612	2	2014-10-11	1	6.23	133	41.1	327	0.97	Ⅱ	3	N43.301	61.4904	1	Ⅱ	1	1	A	0	T81.406
129	63	1	2017-03-04	1	2	1	5	0	1	50	158	20.0288	2	2014-05-05	1	3.67	123	41.4	99	1.43	Ⅲ	2	K31.814	44.6901	1	Ⅲ	1	1	C	1	K63.210
130	70	1	2019-05-27	0	1	1	6	0	1	72	168	25.5102	3	2014-02-18	1	4.27	137	43.9	290	1.51	Ⅱ	2	K40.900x002	53.0401	0	Ⅰ	0	1	A	0
131	37	0	2018-03-06	1	1	2	1	0	1	48	158	19.2277	2	2009-10-10	1	3.77	123	40.7	598	0.58	Ⅰ	4	A16.201	34.5902	0	Ⅲ	1	1	A	0
132	51	0	2018-05-03	0	1	1	5	0	1	50	160	19.5312	2	2013-07-23	1	4.44	118	39.6	223	0.46	Ⅱ	2	N48.102	64.2x00x008	0	Ⅲ	1	1	A	0
133	44	0	2019-04-18	1	1	1	5	0	1	59.5	158	23.8343	2	2008-11-07	1	2.99	108	40.2	383	1.1	Ⅲ	2	E05.900x001	06.3900x004	0	Ⅰ	0	1	A	0
134	41	0	2018-05-29	1	1	1	5	1	1	43	161	16.5889	1	2008-04-13	1	4.05	130	39	956	0.74	Ⅲ	2	N28.828	66.6104	0	Ⅲ	1	1	A	0	J98.414
135	67	1	2018-07-05	0	1	1	6	0	1	57.2	160	22.3438	2	2014-03-11	1	2.66	97	33.9	163	0.18	Ⅲ	3	N40.x00	60.2901	0	Ⅱ	1	0	A	0	R33.x00
136	76	1	2018-01-03	0	1	2	5	0	0	42	155	17.4818	1	2013-07-20	1	2.2	95	35.2	257	0.63	Ⅱ	2	L02.203	54.0x00x013	1	Ⅲ	1	1	C	1	J98.414
137	62	1	2015-05-19	0	2	1	6	0	1	53	154	22.3478	2	2015-06-29	0	4.61	138	42.1	544	1.13	Ⅰ	2	K40.900x003	53.0401	0	Ⅰ	0	1	A	0
138	61	1	2019-02-25	0	1	1	6	0	1	52	168	18.424	1	2018-02-07	1	4.34	138	44.8	209	0.89	Ⅱ	2	K40.900x003	53.0501	0	Ⅰ	0	1	A	0
139	36	0	2019-04-01	1	1	1	6	0	1	59	166	21.4109	2	2008-11-11	1	2.88	123	35.9	220	0.37	Ⅱ	2	D36.705	83.3200x001	0	Ⅰ	0	1	A	0
140	56	0	2019-04-09	0	1	1	4	0	1	53	160	20.7031	2	2019-03-20	0	4.52	92	35.8	88	0.21	Ⅱ	2	I84.201	49.4500x002	1	Ⅲ	1	1	A	0
141	65	1	2017-09-19	1	1	1	6	0	0	39	150	17.3333	1	2009-04-10	1	2.48	87	39.5	312	0.92	Ⅱ	2	A18.300x009	54.1100	1	Ⅲ	1	1	C	1
142	41	0	2019-03-21	0	2	1	5	0	1	50	163	18.8189	2	2010-03-22	1	4.59	157	38.7	585	0.54	Ⅲ	3	K20.100	55.0401	1	Ⅰ	0	0	A	0
143	39	0	2017-09-07	0	2	1	4	0	0	56	162	21.3382	2	2013-04-26	1	3.81	102	35.2	164	0.55	Ⅲ	2	C16.900	43.9901	0	Ⅱ	1	1	C	1
144	40	0	2018-04-11	0	1	2	4	0	1	57	170	19.7232	2	2011-03-16	1	4.32	140	40.9	601	0.38	Ⅱ	2	K40.900x002	53.0501	0	Ⅰ	0	1	A	0
145	31	0	2018-05-18	0	1	1	5	0	1	62	170	21.4533	2	2016-01-08	1	4.73	152	46	229	0.49	Ⅱ	2	K60.303	49.7301	0	Ⅲ	1	1	C	1
146	47	0	2019-02-08	0	2	1	5	0	1	60	175	19.5918	2	2018-11-26	1	4.39	144	41.3	245	0.36	Ⅱ	2	E05.900x001	06.3900x004	0	Ⅰ	0	1	A	0	T81.406
147	43	0	2017-11-09	0	1	1	5	0	1	51	170	17.6471	1	2016-11-02	1	4.35	134	42.2	227	0.18	Ⅱ	3	K20.100	57.0x07	1	Ⅰ	0	0	A	0	R31.x00
148	71	1	2016-10-10	0	1	5	5	0	1	60	165	22.0386	2	2009-11-06	1	4.54	123	43.1	805	1.14	Ⅰ	2	K40.900x003	53.0201	0	Ⅰ	0	1	A	0	T81.406
149	43	0	2019-04-11	1	2	1	6	0	1	48	154	20.2395	2	2011-11-04	0	2.81	117	38	291	0.54	Ⅱ	3	K20.100	59.9901	1	Ⅰ	0	1	A	0
150	42	0	2019-03-14	0	2	1	5	0	1	58	167	20.7967	2	2019-04-02	0	4.46	137	38.7	345	1.15	Ⅲ	3	K20.100	55.1101	1	Ⅰ	0	1	A	0
151	38	0	2018-05-28	0	1	1	5	0	1	58	170	20.0692	2	2014-07-11	1	4.01	132	42.7	1308	1.87	Ⅱ	3	K20.100	59.9901	1	Ⅰ	0	1	A	0	R33.x00
152	37	0	2018-09-30	0	2	1	4	0	0	53	160	20.7031	2	2007-05-02	1	3.83	154	44	626	0.73	Ⅱ	2	K35.900	47.0901	1	Ⅲ	1	1	A	0	T81.406
153	64	1	2016-08-29	0	2	1	5	0	1	52	165	19.1001	2	2016-09-07	0	4.45	134	40.8	460	0.65	Ⅱ	2	K40.900x002	53.0401	0	Ⅰ	0	1	A	0
154	80	1	2019-04-12	0	2	2	5	0	1	64	165	23.5078	2	2019-05-09	0	4.06	105	35.1	64	0.24	Ⅲ	3	N40.x00	60.2901	0	Ⅱ	1	0	A	0	N39.000
155	64	1	2018-09-15	0	1	1	6	0	0	56	158	22.4323	2	2012-07-25	1	6.44	132	40	140	0.23	Ⅲ	3	N40.x00	60.2901	0	Ⅱ	1	0	A	0	R33.x00
156	72	1	2018-04-27	0	2	3	5	0	0	42	162	16.0037	1	2011-11-07	1	3.37	71	42.2	248	0.84	Ⅲ	3	N40.x00	60.2901	0	Ⅱ	1	0	A	0	R33.x00
157	75	1	2018-04-09	0	1	2	4	0	0	58	164	21.5645	2	2017-02-27	1	4.44	151	41.6			Ⅱ	2	K40.900x002	53.0501	0	Ⅰ	0	1	A	0	T81.406
158	60	0	2019-05-06	0	1	1	5	0	1	70	172	23.6614	2	2018-08-06	1	4.15	134	44.2	78	0.37	Ⅱ	3	N40.x00	60.2901	0	Ⅱ	1	0	A	0
159	67	1	2018-03-12	0	2	1	6	0	0	58	168	20.5499	2	2010-09-29	1	4.3	152	44.7	324	0.58	Ⅱ	2	E05.900x001	06.3900x004	0	Ⅰ	0	1	A	0
160	68	1	2019-02-18	0	1	7	6	1	1	27	120	18.75	2		1	3.68	117	42.3	727	0.64	Ⅱ	3	N43.301	63.1x02	0	Ⅰ	0	0	A	0
161	70	1	2017-06-15	0	1	3	4	0	1	64	168	22.6757	2	2013-06-28	1	3	109	42.5	86	0.22	Ⅱ	2	I84.201	49.4500x002	0	Ⅲ	1	1	A	0
162	48	0	2018-06-12	0	1	1	6	0	0	59	160	23.0469	2	2018-03-18	1	4.79	135	40.5	24	0.05	Ⅲ	2	N48.901	64.2x01	0	Ⅱ	1	1	A	0	R31.x00
163	47	0	2019-04-09	0	1	9	4	0	1	63	170	21.7993	2	2009-12-28	1	3.04	134	44.7	413	0.6	Ⅲ	3	K20.100	56.0x04	1	Ⅱ	1	0	A	0
164	51	0	2015-06-05	1	2	6	6	0	1	38	152	16.4474	1	2015-09-08	0	3.08	86	42.4	319	0.26	Ⅱ	2	E05.900x001	06.3900x004	0	Ⅰ	0	1	A	0
165	73	1	2018-05-11	0	1	1	5	0	1	55	158	22.0317	2	2012-08-09	1	2.94	128	43.4	860	3.11	Ⅲ	3	N40.x00	60.2901	1	Ⅱ	1	0	C	1	R31.x00
166	51	0	2019-03-19	0	2	1	6	0	1	49	160	19.1406	2	2011-08-30	1	4.54	157	43.8	245	0.49	Ⅱ	2	K40.900x002	53.0501	0	Ⅰ	0	1	A	0
167	41	0	2017-10-25	0	1	2	4	0	1	68	170	23.5294	2	2007-10-19	1	3.58	140	47.7	255	0.59	Ⅰ	2	R22.205	83.3200x001	0	Ⅰ	0	1	A	0	T81.406
168	49	0	2017-06-05	0	1	8	6	0	1	43	158	17.2248	1		1	2.45	72	25.9	33	0.13	Ⅱ	2	K63.102	46.7901	1	Ⅲ	1	1	A	0
*Codebook
Age group: 0='18-60'，1='>60'.
Gender: 0='Male'，1='Female'.
Ethnicity: 1 = 'Han', 2 = 'Zhuang', 3 = 'Miao', 4 = 'Dong', 5 = 'Mulao'.
Occupation: 1 = 'Farmer', 2 = 'Freelance or Unemployed', 3 = 'Retired', 4 = 'Self-employed', 5 = 'Worker', 6 = 'Teacher', 7 = 'Student', 8 = 'Prisoner in Custody', 9 = 'White collar'.
Educational Background 1= 'Bachelor degree and above', 2= 'College degree', 3= 'Technical secondary school', 4= 'High school', 5= 'Middle school', 6= 'Primary school and below'.
Route of HIV Infection: 0= 'Sexual Transmission', 1= 'Intravenous Drug Use'.
Complication: 0= 'With complications'，1= 'Without complications'.
BMI Category: 1='BMI<18.5'，2='18.5≤BMI≤24'，3='BMI>24'.
Duration of HAART Treatment: 0='<30 days'，1='≥30 days'.
Type of Admission: 0= 'Elective',1= 'Emergency'.
Minimally Invasive Surgery: 0=Yes，1=No.
Wound Healing Category: 1='A', 0='B and C（Excluding 2 Fatal Cases）'.
Surgery Type: 1 = 'Bone and Joint Surgery', 2 = 'General Surgery', 3 = 'Urological surgery', 4 = 'Thoracic Surgery'.
Classification of Incision: 0='Ⅰ'，1='Ⅱand Ⅲ'.
